# Supplementary material for: Effective separation of metal impurities from gypsum nanosludge: synergism of mechanical force and metal species regulation
Source: Royal Society of Chemistry journal article supplement (doi:10.1039/d4en00799a), 2024-10-21
Supplement: d4en00799a1.pdf [file d4en00799a1.pdf]

1  
2  
3  
4  
5  
6  
7  
8  
9  
10  
11  
12  
13  
14  
15  
16  
17  
18  
19  
20  
21

## **Supplementary Information**

### **Effective Separating of Metal Impurities from Gypsum**

### **Nanosludge: Synergism of Mechanical Force and Metal Species**

#### **Regulation**

Changzhou Weng<sup>a, c</sup>, Zhengqiang Zheng<sup>a, c</sup>, Chen Tian<sup>b, d\*</sup>, Zhang Lin<sup>b, c\*</sup>

<sup>a</sup> School of Environment and Energy, Guangdong Provincial Key Laboratory of Solid Wastes Pollution Control and Recycling, South China University of Technology, Guangzhou, Guangdong 510006, China.

<sup>b</sup> Chinese National Engineering Research Center for Control and Treatment of Heavy Metal Pollution, School of Metallurgy and Environment, Central South University, Changsha, Hunan 410083, China.

<sup>c</sup> The Key Laboratory of Pollution Control and Ecosystem Restoration in Industry Clusters (Ministry of Education), South China University of Technology, Guangzhou, Guangdong 510006, China.

<sup>d</sup> School of Future Membrane Technology, Fuzhou University, Fuzhou, 350108, China

#### **This PDF file includes:**

Materials and Methods

Figures S1 to S18

Tables S1 to S5

References

22  
23  
24  
25  
26  
27  
28  
29

## **Contents**

|                            |    |
|----------------------------|----|
| Materials and Methods..... | 3  |
| Figures.....               | 6  |
| Tables.....                | 16 |

## 30 **Materials and Methods**

### 31 **S1. Inductive coupled plasma-optical emission spectroscopy (ICP-OES)**

32 The concentrations of released metals were quantified using Inductively Coupled Plasma  
33 Optical Emission Spectrometry (ICP-OES) on an Agilent 730 spectroscope. Prior to analysis, the  
34 leaching solutions were acidified with nitric acid (HNO<sub>3</sub>) to achieve a pH range of 2–3. To determine  
35 the metal content in solid samples, the solids were fully dissolved in HNO<sub>3</sub> (adjusted to pH = 1.0),  
36 and the resulting digestion solution was then diluted to a constant volume with deionized water. The  
37 metal concentrations in these digestion solutions were measured, and the metal content in the solid  
38 samples was calculated accordingly.

39

### 40 **S2. Analysis of impurities / metals incorporation via the Rietveld refinement method**

41 Mineral identification and quantification in gypsum were conducted through X-ray diffraction  
42 (XRD) analysis using a Bruker D8 Advance diffractometer equipped with a Cu-K $\alpha$  radiation source  
43 (operating at 40 kV and 40 mA) and a LynxEye XE array detector. The XRD patterns were collected  
44 over a 2 $\theta$  range of 5° to 80°, with a step size of 0.02° / 0.01° and a counting time of 0.2-2.0 seconds  
45 per step. Mineral phases were identified by matching patterns against the PDF 2004 and COD 2010  
46 databases from the International Centre for Diffraction Data (ICDD) and Crystallography Open  
47 Database (COD), respectively, using X'Pert HighScore Plus software. Metal incorporation analysis  
48 within gypsum was performed using the Rietveld refinement method in DIFFRAC.TOPAS (version  
49 5.0, Bruker). For quantitative phase analysis, raw structure files from COD were utilized, and  
50 modifications to the chemical formulas in these files were made based on microstructural analysis  
51 to account for metal incorporation<sup>1</sup>.

52

### 53 **S3. Other microscopic characterization**

54 TEM observations and selective area electronic diffraction (SAED) of the samples were

55 performed on a FEI Talos F200X microscope. Elemental mappings and line profiles were tested on  
56 a SuperXG2 energy dispersive X-ray spectroscopy. Scanning electronic microscopy (SEM) was  
57 conducted on a Hitachi SU8100 field emission microscope.

58

#### 59 **S4. Metal-doping content conversion rate**

60 As shown in **Figure S2, Figure S11 and Figure S12**, the equation provided describes the  
61 conversion rate of metal transitioning from a doped state to an undoped state in gypsum samples.  
62 Here is a detailed breakdown of the parameters and how the calculation works:

##### 63 **Equation:**

$$64 \quad D = \frac{d_{raw} - d_{treat}}{d_{raw}} \times 100\%$$

##### 65 **Parameters:**

- 66 •  $D$ , Metal-doping content conversion rate (%). This value indicates the percentage change  
67 from the initial metal-doped state in the raw gypsum to the treated state after milling or  
68 calcination.
- 69 •  $d_{raw}$ , Metal-doping content of the raw gypsum (%). This parameter represents the initial  
70 amount of metal content present in the untreated gypsum samples.
- 71 •  $d_{treat}$ , Metal-doping content of milled or calcined products (%). This reflects the  
72 remaining metal content in the gypsum after the treatment process (milling or  
73 calcination).

##### 74 **Interpretation:**

- 75 • The equation essentially measures the reduction in metal-doping content as a fraction of  
76 the original metal-doping content, indicating the efficiency of the milling or calcination  
77 treatment in excluding the doped metals from the gypsum matrix.
- 78 • A higher value of  $D$  suggests a more effective conversion of metals from the doped to the  
79 undoped state, reflecting effectively metal exclusion during the treatment process.

80

## 81 S5. DFT details

82 In this study, all computational work was performed using the Vienna Ab initio Simulation  
83 Package (VASP)<sup>2</sup> with the projector augmented wave (PAW) method<sup>3</sup>. The Perdew-Burke-  
84 Ernzerhof (PBE)<sup>2</sup> functional within the generalized gradient approximation (GGA) was employed  
85 for the exchange-correlation functional, supplemented by the DFT-D3 correction<sup>4</sup> for dispersion  
86 interactions. A plane-wave cut-off energy of 500 eV was applied, and a 15 Å vacuum layer was  
87 introduced for all surface models to avoid interactions between periodic images. Brillouin zone  
88 sampling was conducted using a 4×4×1 Gamma-centre kpoint sampling. The convergence criterion  
89 for self-consistent field calculations was set to 10<sup>-5</sup> eV, and atomic positions were optimized until  
90 the maximum force on any atom was below 0.02 eV/Å.

91 The primitive unit cells of calcium sulphate dihydrate (DH, CaSO<sub>4</sub>·2H<sub>2</sub>O) and calcium sulfate  
92 hemihydrate (HH, CaSO<sub>4</sub>·0.5H<sub>2</sub>O) were optimized first, and their lattice parameters were  
93 determined. The (020) and (200) surfaces were cleaved from the optimized structures of DH and  
94 HH, respectively, representing the most exposed surfaces<sup>5,6</sup>.

95 The binding energy ( $E_b$ ) for adsorbate incorporation into the substrate was calculated using the  
96 following equation:

$$97 \quad E_b = E_{sur + adsorbate} - E_{sur} - E_{adsorbate}$$

98 Where,

- 99 •  $E_{sur + adsorbate}$  is the total energy of adsorption model;
- 100 •  $E_{sur}$  is the total energy of surface;
- 101 •  $E_{adsorbate}$  is the total energy of adsorbate.

102

103 **S6. The Gibbs free energy change ( $\Delta G$ )**

104 The Gibbs free energy change ( $\Delta G$ ) for a reaction is calculated using the equation:

105 
$$\Delta G = \Delta G^\theta + RT \ln Q$$

- 106 •  $\Delta G^\theta$  is the standard Gibbs free energy change, which can be obtained from standard  
107 Gibbs free energies of formation ( $\Delta G_f^\theta$ , list in **Table S5**) for reactants and products.
- 108 • **R** is the gas constant ( $8.314 \text{ J}\cdot\text{mol}^{-1}\cdot\text{K}^{-1}$ ).
- 109 • **T** is the temperature in Kelvin, typically assumed to be 298 K unless stated otherwise.
- 110 • **Q** is the reaction quotient, calculated based on the concentrations of the reactants and  
111 products

112 Cupric ions ( $\text{Cu}^{2+}$ ) are unstable in thiosulfate solutions, particularly in sodium thiosulfate, due  
113 to rapid redox reactions with  $\text{S}_2\text{O}_3^{2-}$ , as outlined in **Reaction S1**, resulting in the formation of  $\text{Cu}^+$   
114 that cannot sustain the  $\text{Cu}^{2+}$  state for long<sup>7</sup>.

115 **Reaction S1:**

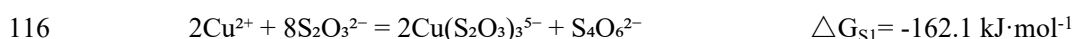

117 According to the speciation diagram analysis conducted by Han et al.<sup>8</sup>,  $\text{Cu}(\text{S}_2\text{O}_3)_3^{5-}$  ions are  
118 likely the primary copper species present in thiosulfate solutions. It is hypothesized that two moles  
119 of  $\text{Cu}^+$  ions can be substituted by one mole of  $\text{Hg}^{2+}$  ions through the **Reaction S2** described below.

120 **Reaction S2:**

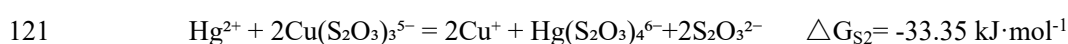

122 The calculated Gibbs free energy changes for **Reaction S1** and **Reaction S2** are  $-162.1 \text{ kJ/mol}$   
123 and  $-33.35 \text{ kJ/mol}$ , respectively. The highly negative Gibbs free energy of **Reaction S1** indicates  
124 that it proceeds spontaneously and completely. **Reaction S2**, with a Gibbs free energy of  $-33.35$   
125  $\text{kJ/mol}$ , also proceeds spontaneously but at a lower magnitude compared to **Reaction S1**.

126

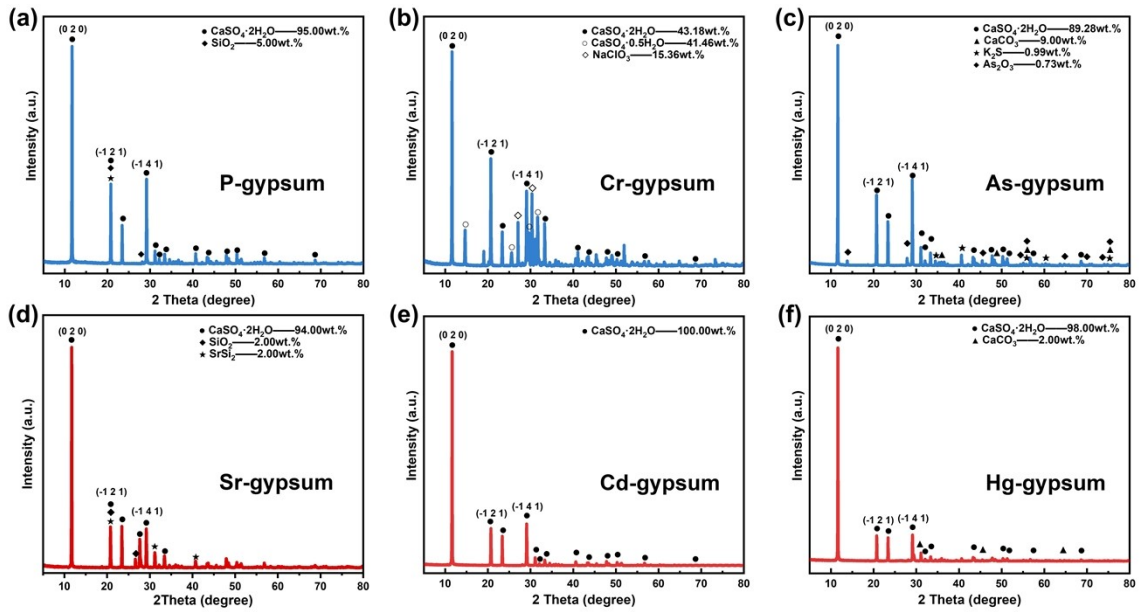

128

129

130

Figure S1. XRD results of the original gypsum samples.

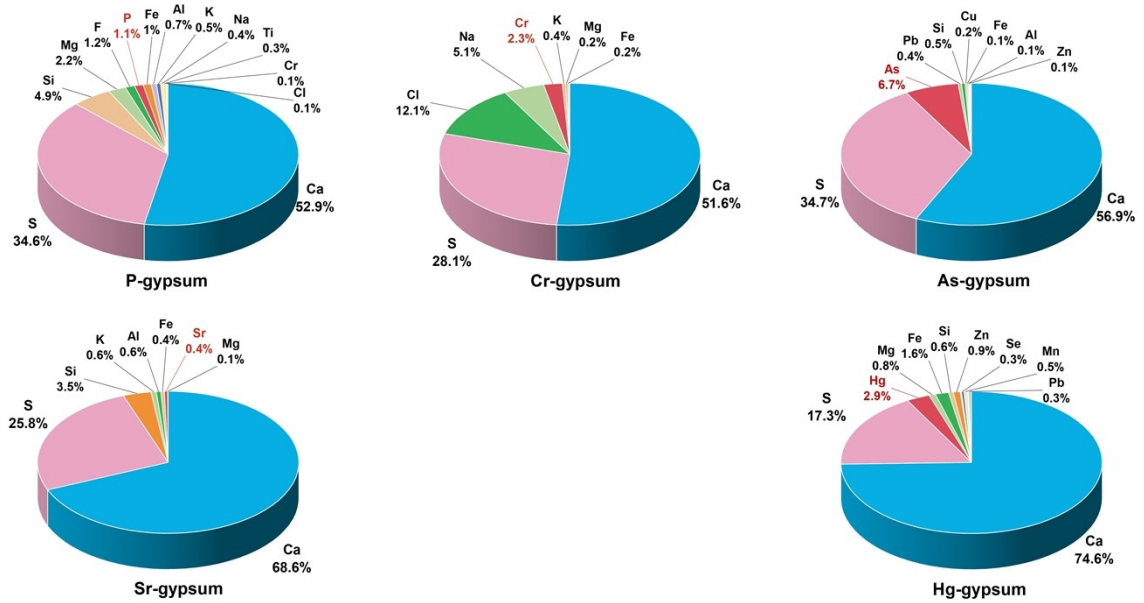

131

132

133

Figure S2. XRF results of the original gypsum samples.

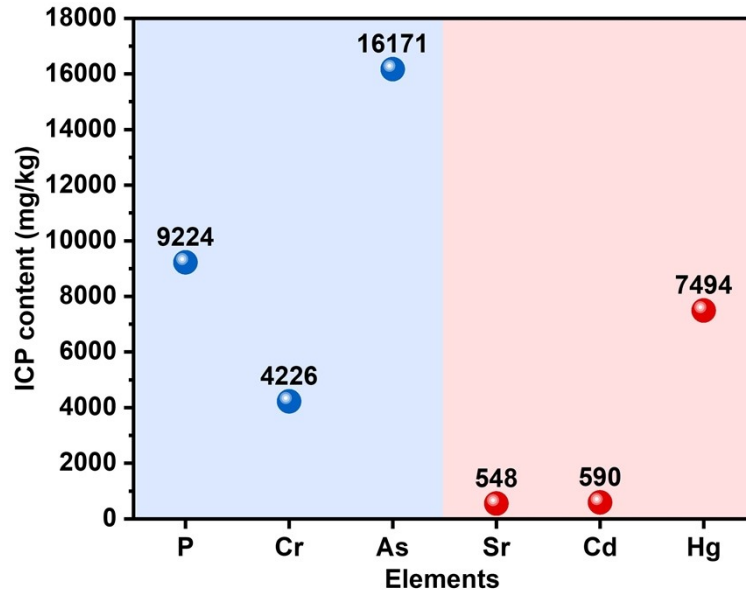

134

135

136

Figure S3. ICP results of the original gypsum samples.

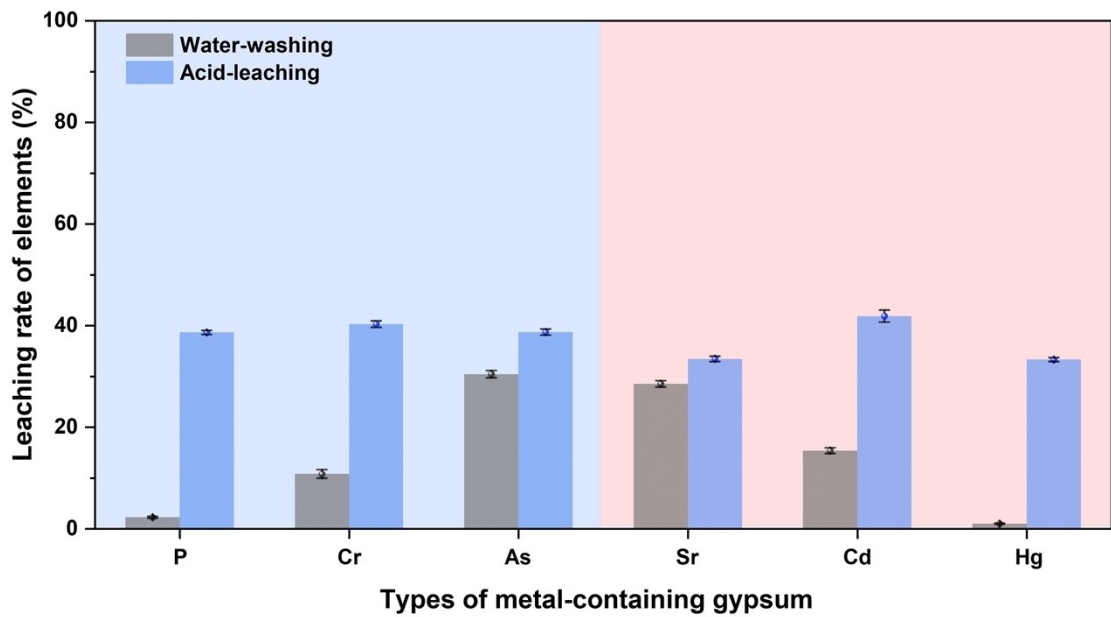

137

138

139

140

Figure S4. Leaching rate of elements in the original gypsum samples after water-washing and acid-leaching.



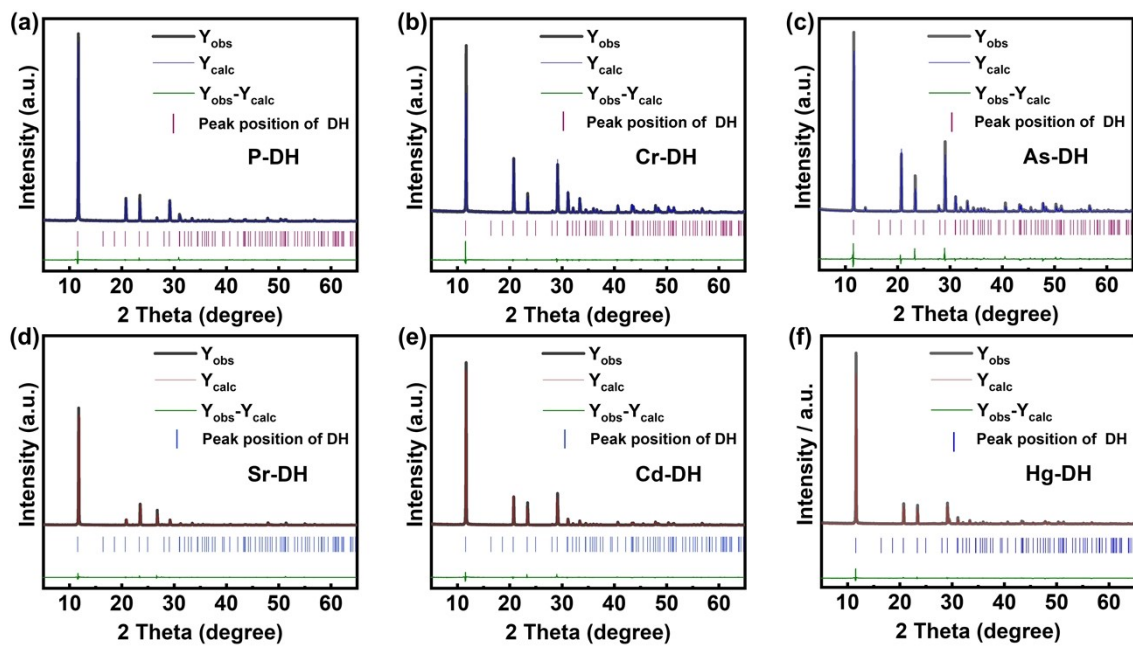

141

142 **Figure S5.** Rietveld refinement of XRD patterns for (a) P-DH, (b) Cr-DH, (c) As-DH, (d) Sr-

143

DH, (e) Cd-DH, and (f) Hg-DH.

144

145 The XPS analysis presented in **Figure S6** provides insight into the valence states and chemical  
146 forms of the various elements incorporated into the gypsum samples.

147 **Figure S6a:** The spectrum displays peaks at 133.65 eV and 134.95 eV, corresponding to  $P^{5+}$   
148  $2p_{3/2}$  and  $2p_{1/2}$ , respectively, indicating the presence of pentavalent phosphorus<sup>9,10</sup>.

149 **Figure S6b:** The weak Cr 2p signals in Cr-gypsum are attributed to the low chromium content.  
150 However, two peaks at 579.8 eV and 589.1 eV were observed, indicating the presence of Cr(VI),  
151 likely as  $CrO_4^{2-}$ , since  $Cr_2O_7^{2-}$  is less probable under alkaline wastewater conditions<sup>11</sup>.

152 **Figure S6c:** For arsenic-doped gypsum, As 3d peaks were fitted at 44.7 eV and 44.2 eV,  
153 corresponding to  $As^{5+}$  and  $As^{3+}$ , respectively. The prominent presence of  $As^{5+}$  observed in XPS  
154 analysis, coupled with the FT-IR and Raman data presented in the surrounding context, indicates  
155 that arsenic primarily exists in its pentavalent state, most likely in the form of  $HAsO_4^{2-12}$ .

156 **Figure S6d:** Sr  $3d_{5/2}$  and Sr  $3d_{3/2}$  peaks appear at 133.84 eV and 135.35 eV, respectively,  
157 confirming the presence of  $Sr^{2+}$  in Sr-gypsum<sup>10</sup>.

158 **Figure S6e:** Cd 3d spectra display two peaks at 405.54 eV ( $Cd\ 3d_{5/2}$ ) and 412.35 eV ( $Cd\ 3d_{3/2}$ ),  
159 with a separation of 6.8 eV, which is characteristic of cadmium compounds<sup>13</sup>.

160 **Figure S6f:** The spectrum shows the deconvoluted Hg 4f spectrum for Hg-gypsum, with  $Hg^{2+}$   
161  $4f_{7/2}$  peaks at 100.04 eV and 102.11 eV, and  $Hg^{2+}\ 4f_{5/2}$  at 104.04 eV, consistent with literature values  
162 for mercury compounds<sup>8,14,15</sup>.

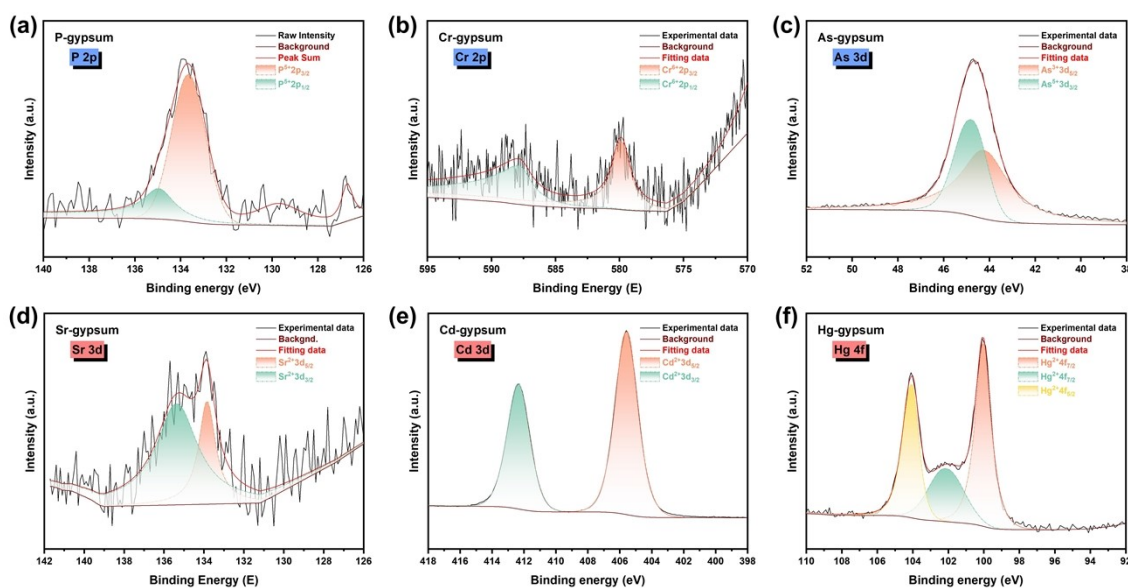

163 **Figure S6.** XPS spectra of (a) P-DH, (b) Cr-DH, (c) As-DH, (d) Sr-DH, (e) Cd-DH, and (f)  
164 Hg-DH.  
165

166 The FT-IR spectra presented in **Figure S7** provide insight into the vibrational modes of  
167 functional groups in the various gypsum samples, with significant differences observed between  
168 pure gypsum and doped samples.

169 **In the FT-IR spectrum of pure gypsum**, characteristic sulfate ion vibrations ( $\text{SO}_4^{2-}$ ) are  
170 observed at  $1004\text{ cm}^{-1}$  ( $\nu_1$ ),  $464\text{ cm}^{-1}$  ( $\nu_2$ ),  $1128\text{ cm}^{-1}$  ( $\nu_3$ ),  $671\text{ cm}^{-1}$  ( $\nu_4$ ), and  $601\text{ cm}^{-1}$  ( $\nu_4$ )<sup>16</sup>. The  
171 bending mode of  $\text{H}_2\text{O}$  molecules is observed at  $1683\text{ cm}^{-1}$  ( $\nu_2$ ) and  $1621\text{ cm}^{-1}$  ( $\nu_2$ ), with the stretching  
172 vibrations of crystal water appearing at  $3521\text{ cm}^{-1}$  ( $\nu_3$ ) and  $3403\text{ cm}^{-1}$  ( $\nu_1$ )<sup>17,18</sup>.

173 **Figure S7a:** In the P-gypsum sample, additional peaks at  $1450\text{ cm}^{-1}$  are assigned to C-H  
174 stretching vibrations, indicating the presence of organic impurities. A distinct peak at  $879\text{ cm}^{-1}$  can  
175 be attributed to the presence of  $\text{HPO}_4^{2-}$ , suggesting phosphate incorporation into the gypsum  
176 matrix<sup>19</sup>.

177 **Figure S7b:** For the Cr-gypsum sample, notable changes are observed compared to pure  
178 gypsum. The peaks at  $2240\text{ cm}^{-1}$  and  $2116\text{ cm}^{-1}$  correspond to the stretching vibrations of  $\text{C}\equiv\text{N}$   
179 bonds, likely indicating the presence of nitrile compounds. A new, sharp peak at  $878\text{ cm}^{-1}$  is  
180 assigned to the  $\text{CrO}_4^{2-}$  group, confirming the incorporation of chromium in the form of chromate<sup>20</sup>.

181 **Figure S7c:** The peak at  $703\text{ cm}^{-1}$  of As-gypsum corresponds to the As-OH stretching  
182 vibration, indicating the presence of  $\text{HAsO}_4^{2-}$  species within the sample. The absence of FTIR bands  
183 between  $750$  and  $860\text{ cm}^{-1}$  suggests that  $\text{AsO}_4^{3-}$  species are not present within the gypsum  
184 structure<sup>21</sup>. Based on the correlation between As content in gypsum and As(V) species, it can be  
185 concluded that  $\text{HAsO}_4^{2-}$  incorporated into the gypsum lattice.

186 **Figure S7d:** In the FT-IR spectrum of Sr-gypsum, additional peaks at  $2242\text{ cm}^{-1}$  and  $2121$   
187  $\text{cm}^{-1}$  correspond to the  $\text{C}\equiv\text{N}$  stretching vibrations, similar to the Cr-gypsum spectrum.  
188 Furthermore, peaks at  $788\text{ cm}^{-1}$  and  $778\text{ cm}^{-1}$  can be attributed to the C-H stretching vibrations,  
189 suggesting the presence of organic contaminants<sup>22</sup>. The sulfate and water vibrations remain largely  
190 unaltered, though slight shifts in peak positions may indicate minor structural perturbations due to  
191 the incorporation of  $\text{Sr}^{2+}$  into the gypsum matrix.

192 **Figure S7e:** The FT-IR spectrum of Cd-gypsum reveals peaks at  $2214\text{ cm}^{-1}$  and  $2116\text{ cm}^{-1}$ ,  
193 again indicating the presence of  $\text{C}\equiv\text{N}$  stretching vibrations, as seen in other doped samples. A new  
194 peak at  $857\text{ cm}^{-1}$  corresponds to Cd-O-H bending vibrations, suggesting cadmium incorporation

195 into the gypsum structure<sup>23</sup>. Additionally, the absorption peaks at 1452 cm<sup>-1</sup> and 1084 cm<sup>-1</sup> indicate  
 196 the presence of CO<sub>3</sub><sup>2-</sup>, suggesting that carbonate ions may have been incorporated into the sample<sup>24</sup>.

197 **Figure S7f:** The Hg-gypsum sample shows significant modifications in the FT-IR spectrum.  
 198 Peaks at 671 cm<sup>-1</sup>, 602 cm<sup>-1</sup>, and 458 cm<sup>-1</sup> correspond to Hg<sup>2+</sup> interactions, while peaks at 1447  
 199 cm<sup>-1</sup> and 874 cm<sup>-1</sup> are assigned to the carbonate ion (CO<sub>3</sub><sup>2-</sup>)<sup>25</sup>. Additionally, peaks at 2920 cm<sup>-1</sup> and  
 200 2855 cm<sup>-1</sup> indicate the presence of carbonate species, likely due to secondary mineral formation.  
 201 The sulfate and water vibrations are present, but some peak broadening suggests structural changes  
 202 induced by mercury incorporation<sup>26</sup>.

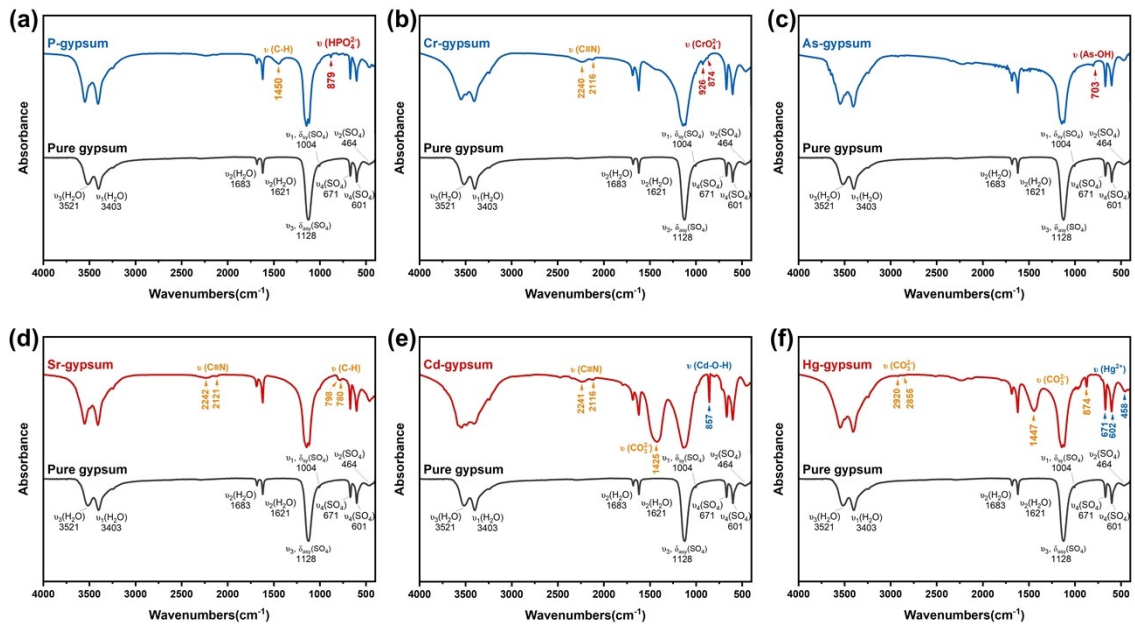

203  
 204 **Figure S7.** FT-IR spectra of (a) P-DH, (b) Cr-DH, (c) As-DH, (d) Sr-DH, (e) Cd-DH, and (f)  
 205 Hg-DH. The peak which is different from pure gypsum is marked in the figure.

206  
 207

208 The Raman spectra provide valuable insights into the incorporation of impurities into the  
209 gypsum structure, as illustrated in **Figure S8**.

210 **Figure S8a:** In the Raman spectrum of the initial phosphogypsum (P-gypsum) sample, peaks  
211 at  $1334\text{ cm}^{-1}$  and  $1611\text{ cm}^{-1}$  are attributed to the stretching and deformation vibrations of C=C  
212 bonds, respectively, which likely arise from organic impurities or residuals commonly found in  
213 phosphogypsum<sup>27</sup>.

214 **Figure S8b:** Comparing the Raman spectrum of Cr-gypsum with pure gypsum, a distinct peak  
215 at  $878\text{ cm}^{-1}$  was observed. This signal aligns closely with the reported stretching vibrations of  $\text{CrO}_4^{2-}$   
216 ( $853\text{-}906\text{ cm}^{-1}$ ) in the literature, confirming the presence of chromate ions in the sample. The  
217 absence of characteristic  $\text{Cr}_2\text{O}_7^{2-}$  signals ( $911\text{-}959\text{ cm}^{-1}$ ) further support this conclusion<sup>28</sup>.  
218 Additionally, a peak at  $673\text{ cm}^{-1}$  could indicate structural disorder caused by the incorporation of  
219 chromium ions into the gypsum<sup>29</sup>.

220 **Figure S8c:** For As-gypsum, the peak around  $674\text{ cm}^{-1}$  is noteworthy when compared to pure  
221 gypsum. This band is typically associated with structural disorder within the crystal lattice, which  
222 suggests arsenic incorporation. This incorporation is likely causing distortions within the gypsum  
223 matrix, which is manifested as an additional Raman feature<sup>30</sup>.

224 **Figure S8d:** The Raman spectrum of Sr-gypsum shows peaks at approximately  $1434\text{ cm}^{-1}$ ,  
225  $1603\text{ cm}^{-1}$ , and  $1758\text{ cm}^{-1}$ , which are absent in pure gypsum. The peak at  $1434\text{ cm}^{-1}$  may correspond  
226 to interactions between  $\text{Sr}^{2+}$  and surrounding sulfate groups ( $\text{SO}_4^{2-}$ ) or water molecules<sup>31</sup>. The signal  
227 at  $1603\text{ cm}^{-1}$  could be linked to Si-O bond vibrations from the  $\text{SiO}_2$  impurities present in the sample.  
228 The peak at  $1758\text{ cm}^{-1}$  likely results from  $\text{Sr}^{2+}$  interactions with other components in the crystalline  
229 structure, such as water molecules or sulfate ions. Overall, these distinct signals are indicative of  
230  $\text{Sr}^{2+}$  incorporation into the gypsum matrix, altering both the crystal structure and the vibrational  
231 behavior of water and  $\text{SO}_4^{2-}$  ions.

232 **Figure S8e:** In Cd-gypsum, the peaks observed at  $670\text{ cm}^{-1}$  and  $1084\text{ cm}^{-1}$  are likely associated  
233 with  $\text{Cd}^{2+}$  incorporation, indicating structural perturbations related to the presence of cadmium<sup>32,33</sup>.

234 **Figure S8f:** For Hg-gypsum, a peak at approximately  $279\text{ cm}^{-1}$  is observed, which may be  
235 attributed to HgS (mercury sulfide) formation. Additionally, the peak at  $1087\text{ cm}^{-1}$  corresponds to  
236 carbonate ( $\text{CO}_3^{2-}$ ) stretching vibrations, indicating the potential presence of calcium carbonate<sup>34</sup>.

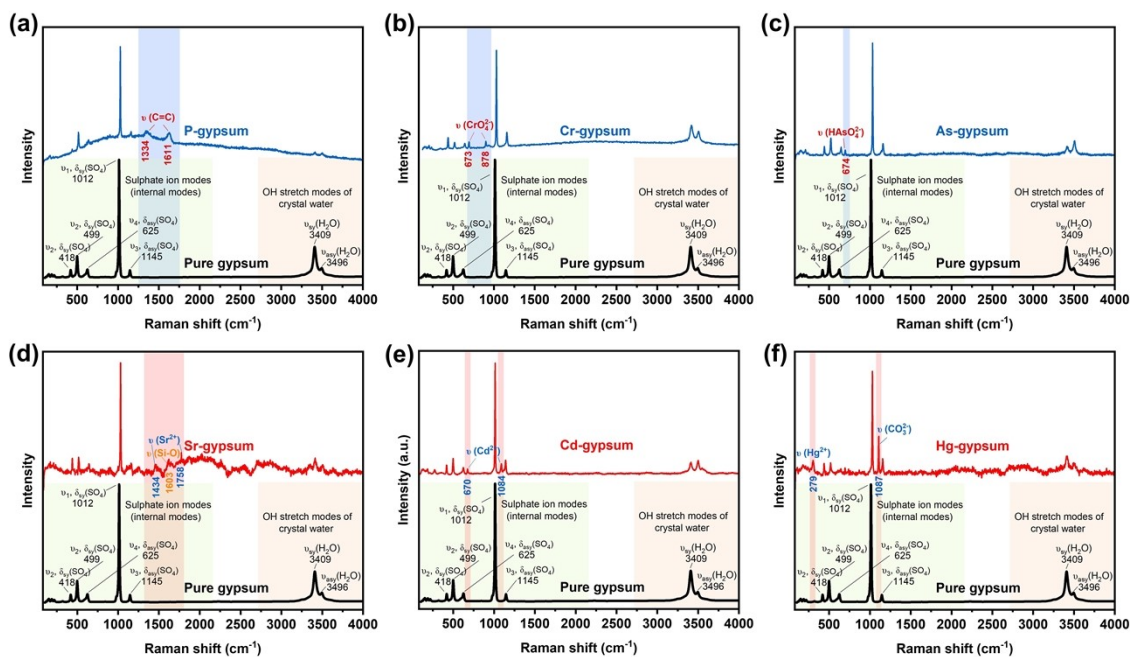

237

238 **Figure S8.** Raman spectra of (a) P-DH, (b) Cr-DH, (c) As-DH, (d) Sr-DH, (e) Cd-DH, and (f)

239

Hg-DH. The peak which is different from pure gypsum is marked in the figure.

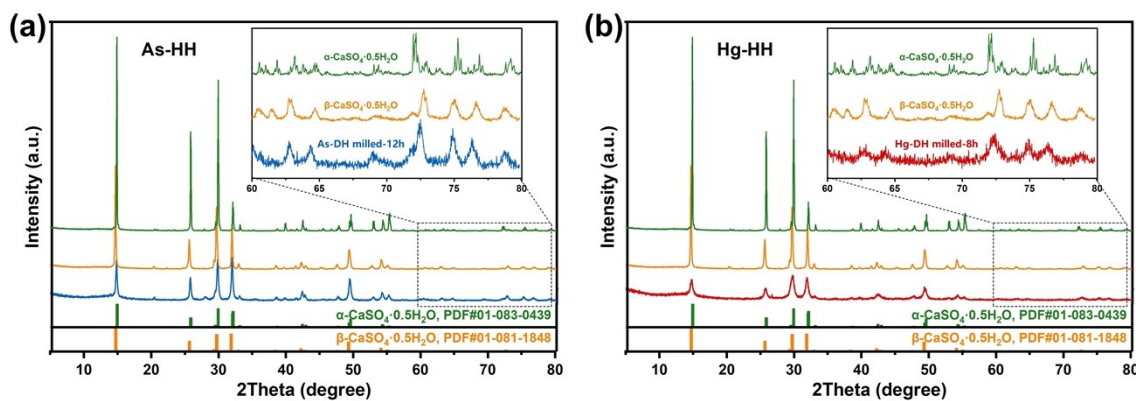

240

241 **Figure S9.** X-ray diffraction (XRD) patterns of  $\alpha$ - $\text{CaSO}_4 \cdot 0.5\text{H}_2\text{O}$  and  $\beta$ - $\text{CaSO}_4 \cdot 0.5\text{H}_2\text{O}$

242

compared with (a) As-HH and (b) Hg-HH prepared via ball-milling.

243

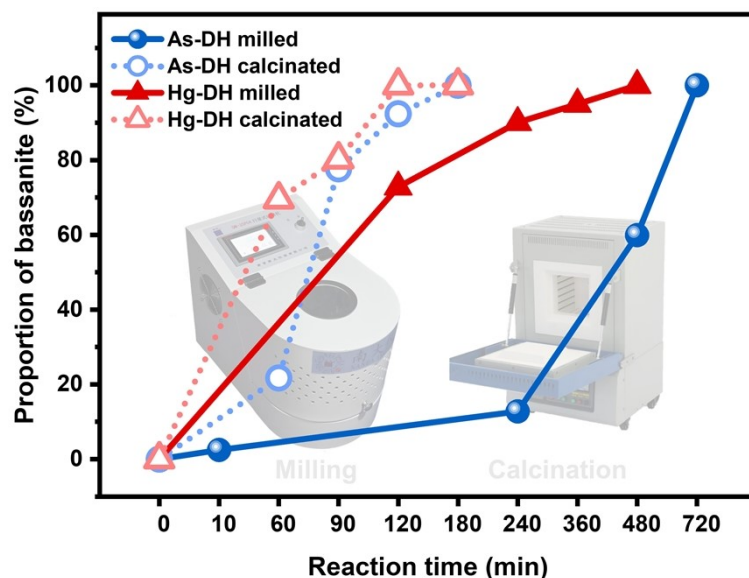

244

245

**Figure S10.** Proportion of bassanite in As-DH and Hg-DH after ball-milling at room

246

temperature or calcination at 120°C for different time.

247

248

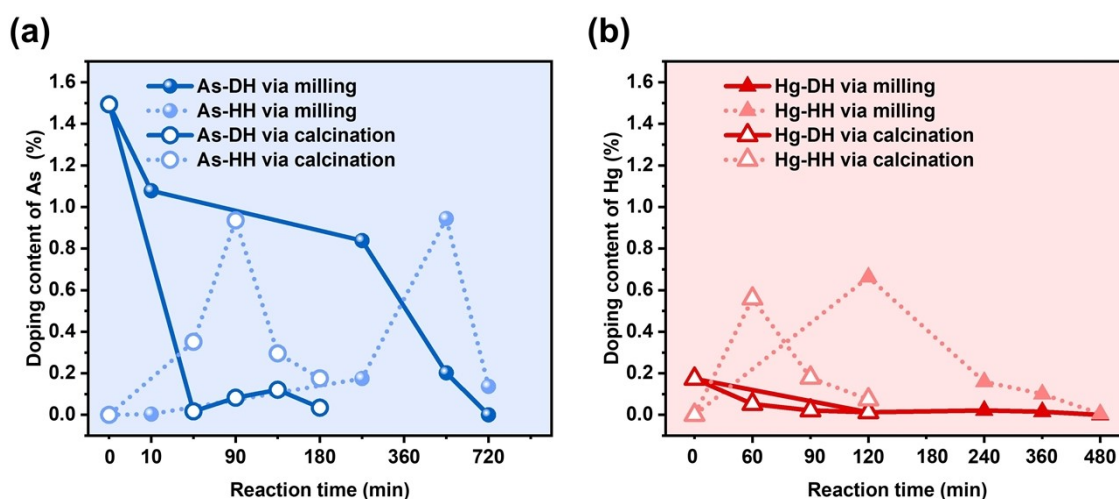

249

250

**Figure S11.** Metal doping content in the products of (a) As-DH and (b) Hg-DH treated

251

through ball-milling or calcination at different times.

252

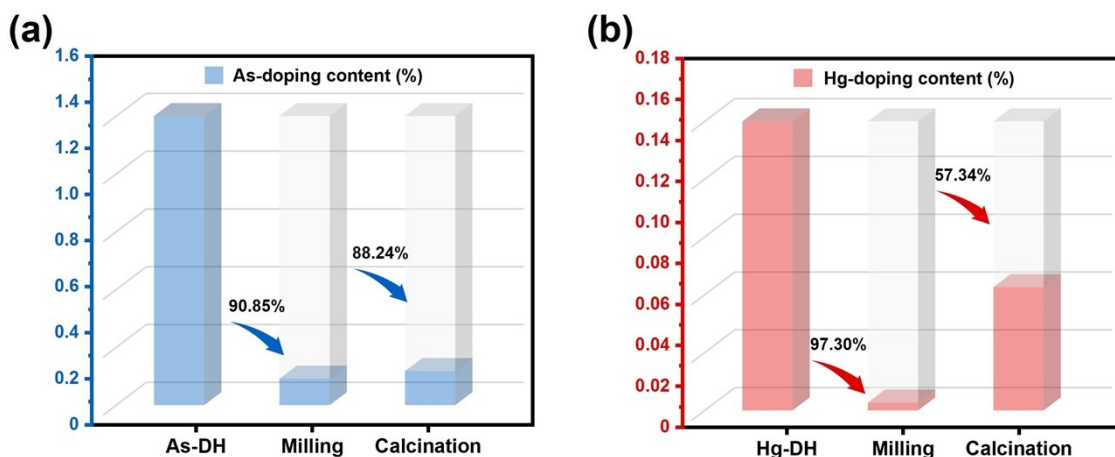

253

254

**Figure S12.** Metal doping content changes in the hemihydrate products of (a) As-DH and (b)

255

Hg-DH treated by milling or calcination.

256

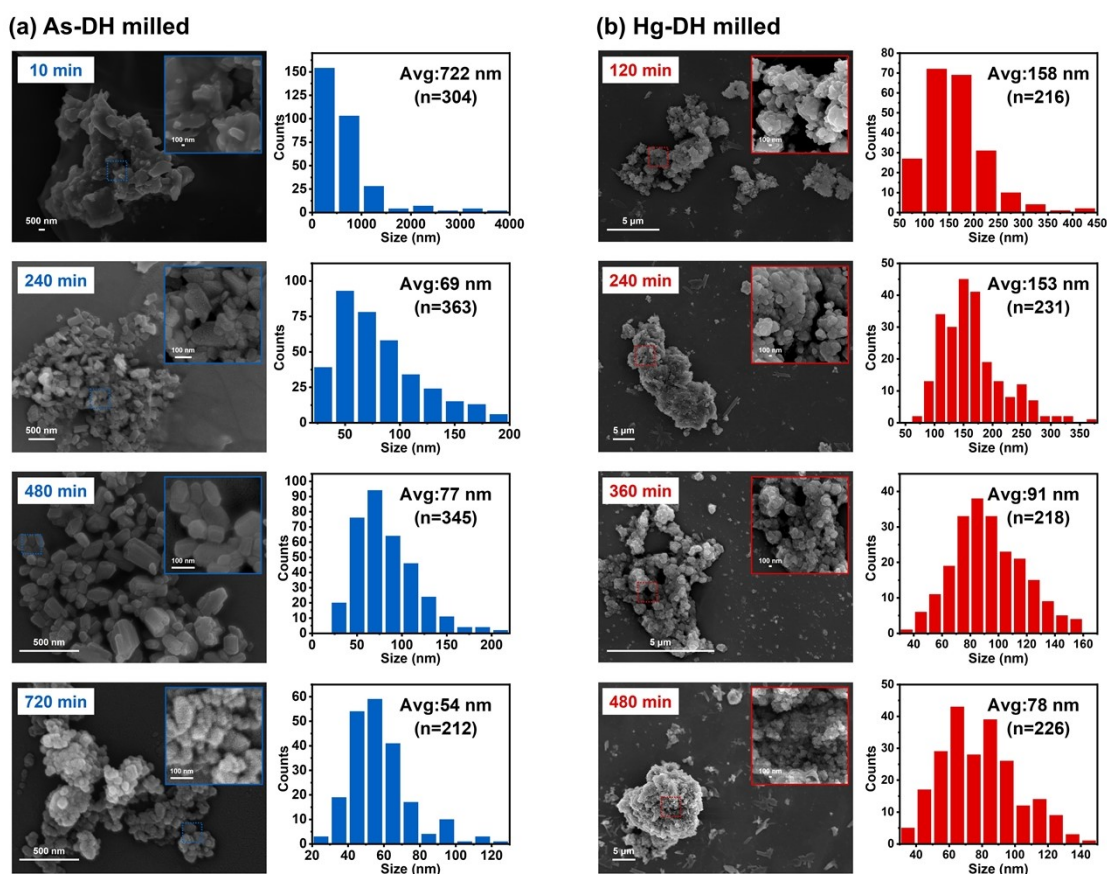

257

258

**Figure.S13** SEM images and particle size distributions of the milled products for (a)As-DH

259

and (b)Hg-DH.

260



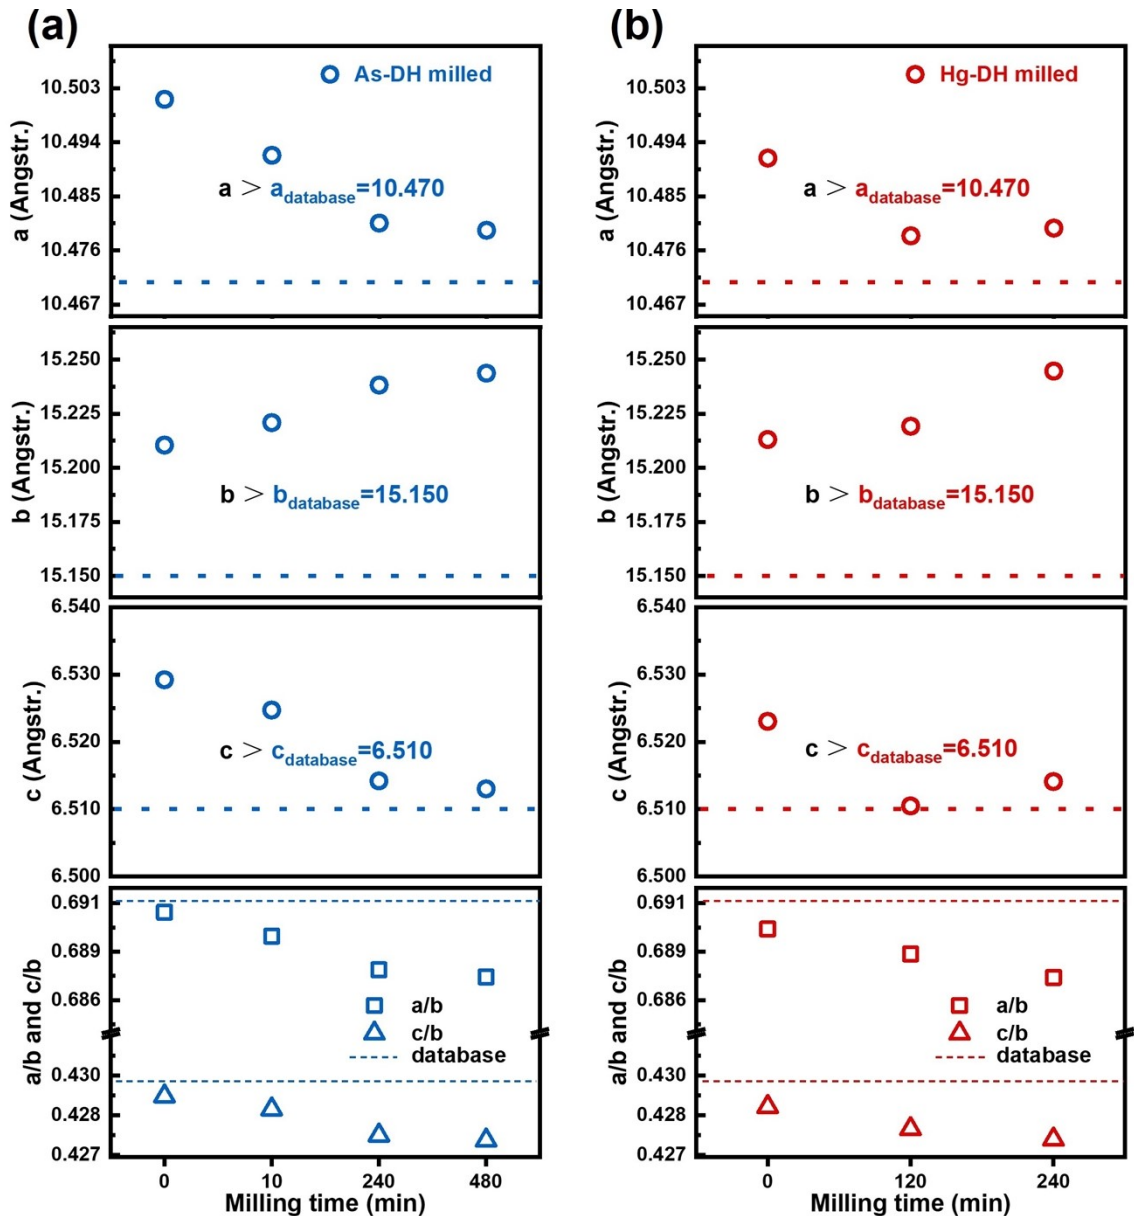

261

262 **Figure S14.** Evolution of the lattice parameters with the milling time for (a) As-DH and (b)

263 Hg-DH. The dashed lines indicate the values from the ICDD database, gypsum 01-072-0596.

264

(a) As-DH calcinated

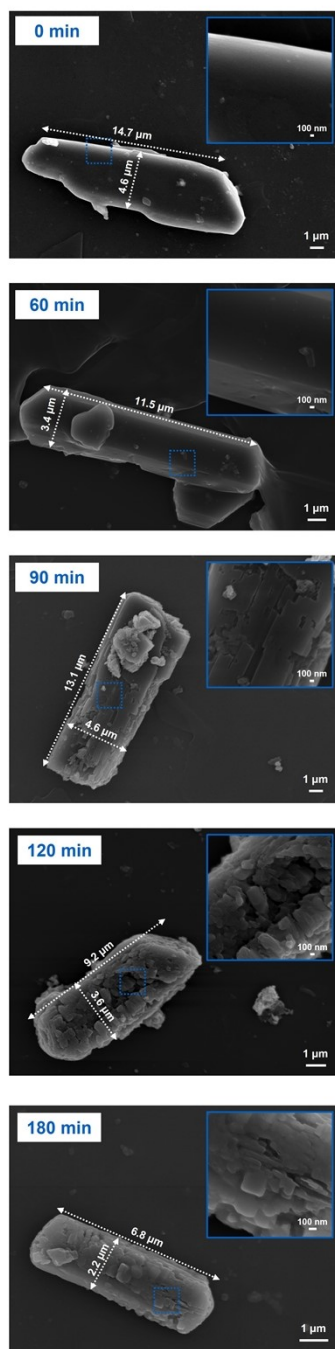

(b) Hg-DH calcinated

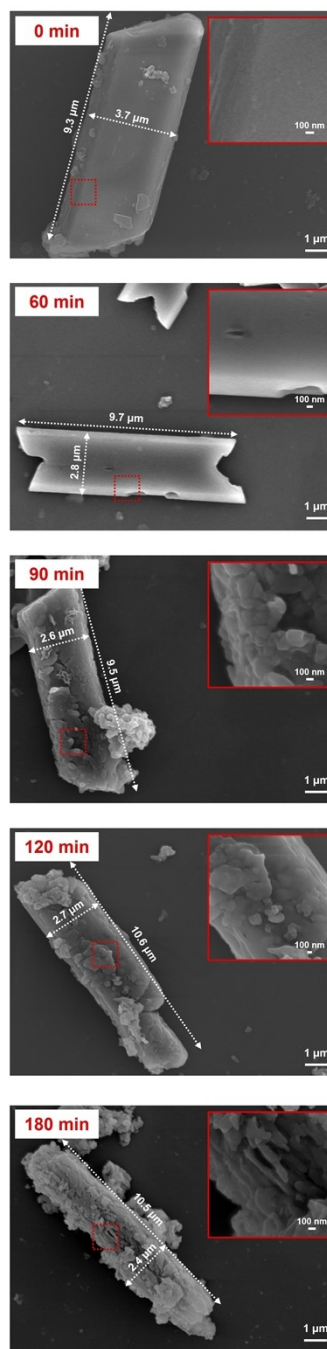

265

266

267

Figure.S15 SEM images of the calcinated products for (a)As-DH and (b)Hg-DH.

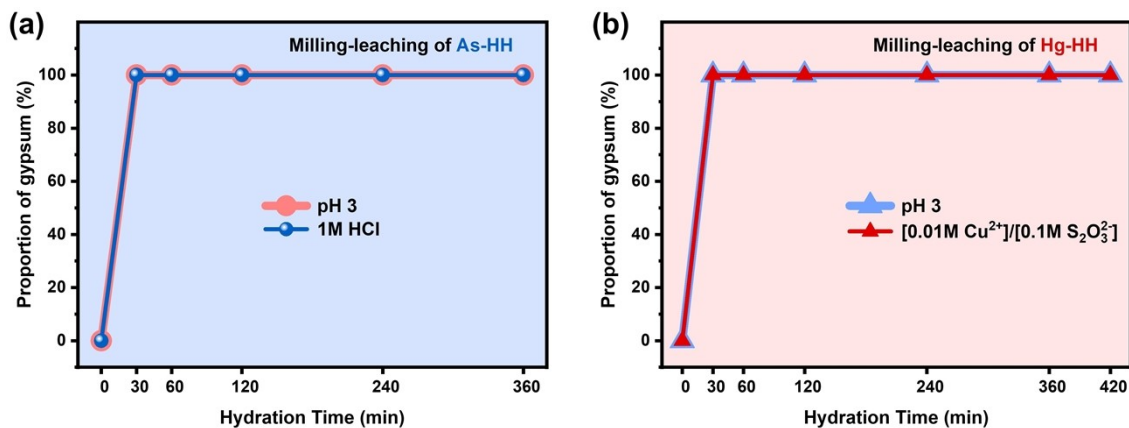

268

269 **Figure S16.** The proportion of gypsum in the hydration products of (a) As-HH and (b) Hg-

270 HH obtained by ball-milling in pH=3, 1M HCl or [0.01M Cu<sup>2+</sup>]/[0.1M S<sub>2</sub>O<sub>3</sub><sup>2-</sup>] solution.

271

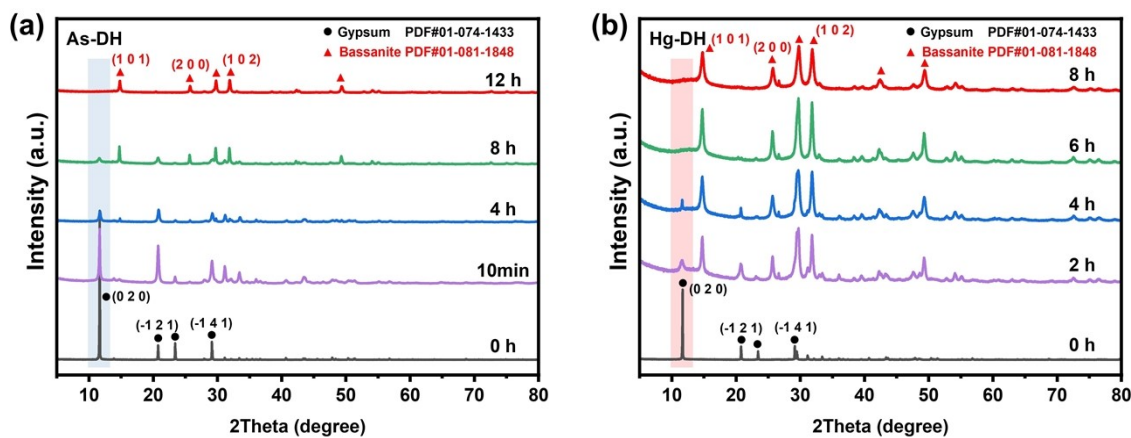

272

273 **Figure S17.** XRD patterns of the phases of (a) As-DH and (b) Hg-DH milled for different

274 times.

275

276 **Milled As-HH:** As shown in Figure S18a, the fitted  $3d_{5/2}$  peak for  $As^{5+}$  appears at  
277 approximately 44.7 eV, while the  $3d_{5/2}$  peak for  $As^{3+}$  is located at around 44.2 eV. These peak  
278 positions are in agreement with the corresponding peaks in the As-gypsum (Figure S6a), indicating  
279 that arsenic primarily exists in its pentavalent form, likely as  $HAsO_4^{2-}$ .

280 **Milled Hg-HH:** As depicted in Figure S18b, the deconvoluted Hg 4f spectrum shows that the  
281  $Hg^{2+} 4f_{7/2}$  peaks are located at 100.04 eV and 102.11 eV, while the  $4f_{5/2}$  peak appears at 104.04 eV.  
282 These values align with literature values for mercury compounds, indicating that mercury remains  
283 primarily in the  $Hg^{2+}$  state as raw Hg-gypsum (Figure S6f), with no significant changes in its valence  
284 state during the milling process.

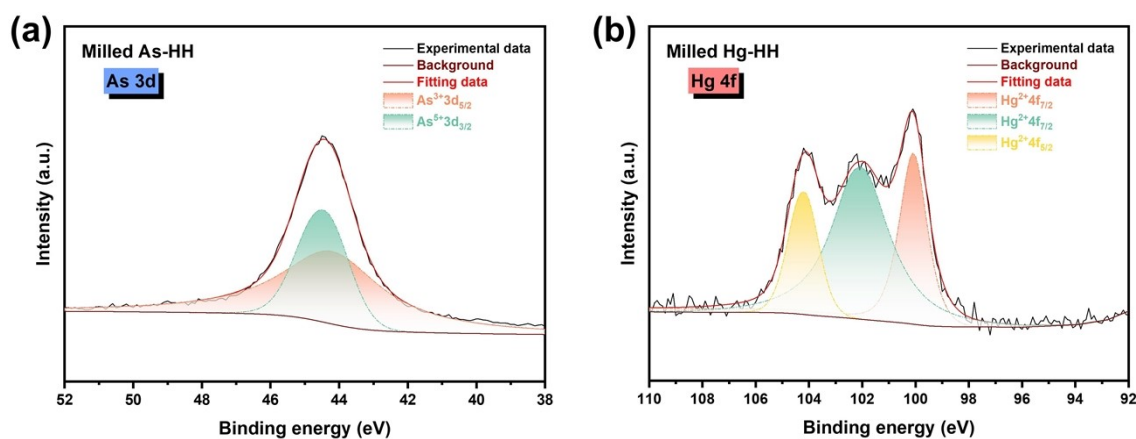

285

286 **Figure S18.** XPS spectra of (a) As-HH and (b) Hg-HH obtained by ball-milling.

288 **Table S1.** Origins of gypsum samples.

| Gypsum samples | Place of production                                                      | Origin                                                                                                                                                                                                 |
|----------------|--------------------------------------------------------------------------|--------------------------------------------------------------------------------------------------------------------------------------------------------------------------------------------------------|
| P-gyp          | HuBei DongSheng Chemical Group                                           | Byproduct of phosphoric acid production                                                                                                                                                                |
| Cr-gyp         | CNSIG Inner Mongolia Chemical Industry Co., Ltd., Inner Mongolia, China. | The treatment of chromium-containing wastewater in chlorate industry                                                                                                                                   |
| As-gyp         | Henan Province, China                                                    | The precipitate residue obtained during the wastewater treatment process in a copper smelting plant.                                                                                                   |
| Sr-gyp         | Minqin County, Gansu Province, China                                     | The natural desert rose                                                                                                                                                                                |
| Cd-gyp         | Laboratory synthesis                                                     | /                                                                                                                                                                                                      |
| Hg-gyp         | Jinchuan Group Co., Ltd., Baiyin City, Gansu Province, China             | In the process of acetylene production, typically achieved through the reaction of acid with calcium carbide, the precipitate residue obtained from treating acidic wastewater with calcium hydroxide. |

289

290 **Table S2.** Incorporation amount of P, Cr, As, Sr, Cd, and Hg in calcium sulphate dihydrate.

| Items          | HPO <sub>4</sub> <sup>2-</sup> | CrO <sub>4</sub> <sup>2-</sup> | HAsO <sub>4</sub> <sup>2-</sup> | Sr <sup>2+</sup> | Cd <sup>2+</sup> | Hg <sup>2+</sup> |
|----------------|--------------------------------|--------------------------------|---------------------------------|------------------|------------------|------------------|
| M-XRD[a] (%)   | 4.76                           | 1.19                           | 2.85                            | 0.020            | 0.050            | 0.15             |
| M-XRD[b] (%)   | 0.82                           | 0.35                           | 1.47                            | 0.0099           | 0.033            | 0.17             |
| M-total[c] (%) | 0.92                           | 0.42                           | 3.06                            | 0.058            | 0.059            | 0.75             |

291 [a] Atomic incorporation ratio obtained by Rietveld refinement of XRD.

292 [b] Mass amount of metal incorporation (e.g. As or Hg) is obtained through Rietveld  
293 refinement of XRD.

294 [c] Metal-total values are obtained from ICP–MS analysis.

295

296

**Table S3.** As extraction rates of gypsum wastes with different treatments.

| Treating method                   | Reagent                               | Concentration or Volume of addition | Temperature (°C) | Reaction time (h) | Extraction efficiency | References                                         |
|-----------------------------------|---------------------------------------|-------------------------------------|------------------|-------------------|-----------------------|----------------------------------------------------|
| Milling-leaching                  | H <sub>2</sub> SO <sub>4</sub>        | 0.50M                               | 25               | 6                 | 99.80%                | Our work                                           |
| Leaching in bulk solution         | H <sub>2</sub> SO <sub>4</sub>        | 5.62M                               | 30               | 24                | 50.30%                | Journal of Hazardous Materials, 2024, 469, 134027  |
| Nanoscale sulfuric acid film      | H <sub>2</sub> SO <sub>4</sub>        | 5.62M                               | 50               | 12                | 99.30%                | Journal of Hazardous Materials. 2024. 469. 134027. |
| Conventional leaching             | H <sub>2</sub> SO <sub>4</sub>        | 1.68M                               | 65               | 1                 | 79.67%                | Journal of Cleaner Production. 2022. 381. 135163.  |
| Ultrasound-enhanced sulfuric acid | H <sub>2</sub> SO <sub>4</sub>        | 1.68M                               | 65               | 1                 | 97.07%                | Journal of Cleaner Production. 2022. 381. 135163.  |
| Hydrothermal recrystallization    | HCl or H <sub>2</sub> SO <sub>4</sub> | 6.00M                               | 120              | 24                | 99.60%                | Chemosphere. 2020. 250. 126290.                    |
| Roasting                          | Anthracite                            | 10 wt%                              | 850              | 1                 | 90.00%                | Chemosphere. 2022. 296. 134078.                    |

**Table S4.** Hg extraction rates of solid-wastes with different treatments.

| Treating method                             | Reagent                                                            | Concentration  | Temperature (°C) | Reaction time (h) | Extraction efficiency | References                                                                                       |
|---------------------------------------------|--------------------------------------------------------------------|----------------|------------------|-------------------|-----------------------|--------------------------------------------------------------------------------------------------|
| Milling-leaching                            | [Cu <sup>2+</sup> ]/[S <sub>2</sub> O <sub>3</sub> <sup>2-</sup> ] | [0.01M]/[0.1M] | 25               | 7                 | 99.15%                | Our work                                                                                         |
| Iodide solution system                      | [KI]/[NaClO]                                                       | [0.1M]/[0M]    | 40               | 1                 | 81.22%                | Journal of Hazardous Materials. 2019. 363. 179-186.                                              |
| Iodide solution system                      | [KI]/[NaClO]                                                       | [0.1M]/[0.4M]  | 40               | 1                 | 99.00%                | Journal of Hazardous Materials. 2019. 363. 179-186.                                              |
| Iodide solution system                      | [KI]/[NaClO]                                                       | [0.1M]/[0M]    | 40               | 1                 | 58.24%                | Journal of Hazardous Materials. 2019. 363. 179-186.                                              |
| Iodide solution system                      | [KI]/[NaClO]                                                       | [0.1M]/[0.4M]  | 40               | 1                 | 96.00%                | Journal of Hazardous Materials. 2019. 363. 179-186.                                              |
| Leaching with cuprous-thiosulfate solutions | [Cu <sup>2+</sup> ]/[S <sub>2</sub> O <sub>3</sub> <sup>2-</sup> ] | [0.01M]/[0.1M] | 44               | 7                 | 92.37%                | Separation and Purification Technology. 2017. 177. 223-232.                                      |
| Direct leaching                             | [Cu <sup>2+</sup> ]/[S <sub>2</sub> O <sub>3</sub> <sup>2-</sup> ] | [0.2M]/[0.1M]  | 45               | 6                 | 85.68%                | A Fundamental Study on Thiosulfate Leaching and Recovery of Mercury-bearing Solid Waste. 2019.06 |

301

302

303

304

**Table S5.** Standard Gibbs free energies of formation for various compounds.

| <b>Ionic (group)</b>                        | <b><math>\Delta G_f</math> (kJ·mol<sup>-1</sup>)</b> |
|---------------------------------------------|------------------------------------------------------|
| Cu <sup>+</sup>                             | 50.0                                                 |
| Cu <sup>2+</sup>                            | 65.5                                                 |
| Hg <sup>2+</sup>                            | 164.4                                                |
| S <sub>2</sub> O <sub>3</sub> <sup>2-</sup> | -552.5                                               |
| S <sub>4</sub> O <sub>6</sub> <sup>2-</sup> | -1037.5                                              |

305

306



## References

- 309 1 W. Liu, J. Zheng, X. Ou, X. Liu, Y. Song and C. Tian, *et al.*, Effective Extraction of Cr(VI) from  
310 Hazardous Gypsum Sludge via Controlling the Phase Transformation and Chromium Species,  
311 *Environ. Sci. Technol.*, 2018, **52**(22), 13336-13342.
- 312 2 K. Burke, M. Ernzerhof and J. P. Perdew, Generalized Gradient Approximation Made Simple, *Phys.*  
313 *Rev. Lett.*, 1996, **77**(18), 3865-3868.
- 314 3 G. Kresse and D. Joubert, From ultrasoft pseudopotentials to the projector augmented-wave method,  
315 *Phys. Rev. B*, 1999, **59**(3), 1758-1775.
- 316 4 S. Grimme, J. Antony, S. Ehrlich and H. Krieg, A consistent and accurate ab initio parametrization of  
317 density functional dispersion correction (DFT-D) for the 94 elements H-Pu, *The Journal of*  
318 *Chemical Physics*, 2010, **132**(15), 154104.
- 319 5 E. van der Voort and P. Hartman, The habit of gypsum and solvent interaction, *J. Cryst. Growth*,  
320 1991, **112**(2), 445-450.
- 321 6 X. Zhang, J. Wang, J. Wu, X. Jia, Y. Du and H. Li, *et al.*, Phase- and morphology-controlled  
322 crystallization of gypsum by using flue-gas-desulfurization gypsum solid waste, *J. Alloy. Compd.*,  
323 2016, **674**, 200-206.
- 324 7 G. S. James, Lange's handbook of chemistry, *CD & W Inc, Wyoming*, 2005.
- 325 8 C. Han, W. Wang, F. Xie and T. Zhang, Mechanism and kinetics of mercuric sulfide leaching with  
326 cuprous-thiosulfate solutions, *Sep. Purif. Technol.*, 2017, **177**, 223-232.
- 327 9 K. S. Siow, L. Britcher, S. Kumar and H. J. Griesser, XPS study of sulfur and phosphorus compounds  
328 with different oxidation states, *Sains Malays.*, 2018, **47**(8), 1913-1922.
- 329 10 S. Komai, M. Hirano and N. Ohtsu, Spectral analysis of Sr 3d XPS spectrum in Sr-containing  
330 hydroxyapatite, *Surf. Interface Anal.*, 2020, **52**(12), 823-828.
- 331 11 E. Desimoni, C. Malitesta, P. G. Zambonin and J. C. Rivière, An x-ray photoelectron spectroscopic  
332 study of some chromium–oxygen systems, *Surf. Interface Anal.*, 1988, **13**(2-3), 173-179.
- 333 12 H. Zhai, L. Wang, J. Hövelmann, L. Qin, W. Zhang and C. V. Putnis, Humic Acids Limit the  
334 Precipitation of Cadmium and Arsenate at the Brushite–Fluid Interface, *Environ. Sci. Technol.*,  
335 2019, **53**(1), 194-202.
- 336 13 Z. Ren, L. Wang, H. Wang, F. Gao, S. Liu and J. Ren, Synergistic solidification/stabilization  
337 mechanism of cadmium in phosphogypsum slag-based cementitious material, *Constr. Build. Mater.*,  
338 2023, **400**, 132802.
- 339 14 V. I. Nefedov, Y. V. Salyn, P. M. Solozhenkin and G. Y. Pulatov, X-ray photoelectron study of surface  
340 compounds formed during flotation of minerals, *Surf. Interface Anal.*, 1980, **2**(5), 170-172.
- 341 15 P. Humbert, An XPS and UPS photoemission study of HgO, *Solid State Commun.*, 1986, **60**(1), 21-  
342 24.
- 343 16 Y. Liu, A. Wang and J. J. Freeman, 40th Annual Lunar and Planetary Science Conference, 2009.
- 344 17 J. L. Bishop, M. D. Lane, M. D. Dyar, S. J. King, A. J. Brown and G. A. Swayze, Spectral properties  
345 of Ca-sulfates: Gypsum, bassanite, and anhydrite, *Am. Miner.*, 2014, **99**(10), 2105-2115.
- 346 18 P. S. R. Prasad, Direct formation of the  $\gamma$ -CaSO<sub>4</sub> phase in dehydration process of gypsum: In situ  
347 FTIR study, *Am. Miner.*, 2005, **90**(4), 672-678.
- 348 19 Z. Zheng, C. Weng, Z. Kang, M. Zhong, C. Yu and Z. Lin, *et al.*, Recycling industrial byproduct

349 gypsum for use as plastering materials by the tandem pyro-hydro process: impurities removal,  
350 whiteness improvement, and regularity of phase evolution, *J. Mater. Cycles Waste Manag.*, 2024.

351 20 P. Sayan, S. Titiz-Sargut and B. Avci, Effect of trace metals on reactive crystallization of gypsum,  
352 *Cryst. Res. Technol.*, 2007, **42**(10), 961-970.

353 21 S. Wang, D. Zhang, X. Ma, G. Zhang, Y. Jia and K. Hatada, Spectroscopic and DFT study on the  
354 species and local structure of arsenate incorporated in gypsum lattice, *Chem. Geol.*, 2017, **460**, 46-  
355 53.

356 22 A. Pouria, H. Bandegani, M. Pourbaghi-Masouleh, S. Hesaraki and M. Alizadeh, Physicochemical  
357 Properties and Cellular Responses of Strontium-Doped Gypsum Biomaterials, *Bioinorg. Chem.*  
358 *Appl.*, 2012, **2012**, 1-9.

359 23 X. Ma, M. A. Gomez, Z. Yuan, R. Bi, J. Zhang and S. Wang, *et al.*, Incorporation of trace metals Cu,  
360 Zn, and Cd into gypsum: Implication on their mobility and fate in natural and anthropogenic  
361 environments, *Chem. Geol.*, 2020, **541**(119574), 119574.

362 24 Y. Yan, X. Dong, X. Sun, X. Sun, J. Li and J. Shen, *et al.*, Conversion of waste FGD gypsum into  
363 hydroxyapatite for removal of Pb<sup>2+</sup> and Cd<sup>2+</sup> from wastewater, *J. Colloid. Interface. Sci.*, 2014,  
364 **429**, 68-76.

365 25 M. Sun, J. Hou, G. Cheng, S. A. Baig, L. Tan and X. Xu, The relationship between speciation and  
366 release ability of mercury in flue gas desulfurization (FGD) gypsum, *Fuel*, 2014, **125**, 66-72.

367 26 A. M. Hussein, F. S. Madkour, H. M. Afifi, M. Abdel-Ghani and M. Abd Elfatah, Comprehensive  
368 study of an ancient Egyptian foot case cartonnage using Raman, ESEM-EDS, XRD and FTIR, *Vib.*  
369 *Spectrosc.*, 2020, **106**, 102987.

370 27 K. Dostert, C. P. O'Brien, W. Liu, W. Riedel, A. Savara and A. Tkatchenko, *et al.*, Adsorption of  
371 isophorone and trimethyl-cyclohexanone on Pd(111): A combination of infrared reflection  
372 absorption spectroscopy and density functional theory studies, *Surf. Sci.*, 2016, **650**, 149-160.

373 28 J. D. Ramsey, L. Xia, M. W. Kendig and R. L. Mccreery, Raman spectroscopic analysis of the  
374 speciation of dilute chromate solutions, *Corros. Sci.*, 2001, **43**(8), 1557-1572.

375 29 T. Akyuz, S. Akyuz and A. Gulec, Elemental and spectroscopic characterization of plasters from Fatih  
376 Mosque-Istanbul (Turkey) by combined micro-Raman, FTIR and EDXRF techniques,  
377 *Spectrochimica Acta Part A: Molecular and Biomolecular Spectroscopy*, 2015, **149**, 744-750.

378 30 S. Das, J. Essilfie-Dughan and M. J. Hendry, Fate of adsorbed arsenate during phase transformation  
379 of ferrihydrite in the presence of gypsum and alkaline conditions, *Chem. Geol.*, 2015, **411**, 69-80.

380 31 P. S. R. Prasad, N. Ravikumar, A. S. R. Krishnamurthy and L. P. Sarma, Role of impurities in  
381 gypsum– bassanite phase transition: A comparative Raman study, *Curr. Sci.*, 1998, **75**(12), 1410-  
382 1414.

383 32 C. Zou, Z. Shi, Y. Yang, J. Zhang, Y. Hou and N. Zhang, in *Minerals*, 2023, vol. 13.

384 33 Y. Wan, X. Wang, W. Hu, I. Chou, X. Wang and Y. Chen, *et al.*, In situ optical and Raman  
385 spectroscopic observations of the effects of pressure and fluid composition on liquid–liquid phase  
386 separation in aqueous cadmium sulfate solutions ( $\leq 400^\circ\text{C}$ , 50MPa) with geological and  
387 geochemical implications, *Geochim. Cosmochim. Acta*, 2017, **211**, 133-152.

388 34 M. De La Pierre, C. Carteret, L. Maschio, E. André, R. Orlando and R. Dovesi, The Raman spectrum  
389 of CaCO<sub>3</sub> polymorphs calcite and aragonite: A combined experimental and computational study,  
390 *The Journal of Chemical Physics*, 2014, **140**(16), 164509.

391
